# Supplementary material for: Heteroleptic tethered NHC rare earth initiators for the ring opening polymerisation of rac-lactide
Source: Royal Society of Chemistry journal article supplement (doi:10.1039/d5dt01352f), 2025-01-01
Supplement: d5dt01352f1.pdf [file d5dt01352f1.pdf]

## Electronic supplementary information for: Heteroleptic Tethered NHC Rare Earth Initiators for the Ring Opening Polymerisation of *rac*-Lactide

Joseph W. Walker,<sup>a</sup> Tajrian Chowdhury,<sup>b</sup> Georgina M. Rosair,<sup>a</sup> Joy H. Farnaby,<sup>b</sup> Stephen M. Mansell<sup>a</sup> and Ruairaidh D. McIntosh<sup>a</sup>

- a. Institute of Chemical Sciences, Heriot-Watt University, Edinburgh EH14 4AS, UK; E-mail: S.Mansell@hw.ac.uk, R.McIntosh@hw.ac.uk  
b. School of Chemistry, University of Glasgow, Joseph Black Building, Glasgow, G12 8QQ, UK

### Table of Contents

|                                                                                                                                                |    |
|------------------------------------------------------------------------------------------------------------------------------------------------|----|
| Experimental details and NMR spectra .....                                                                                                     | 2  |
| <sup>1</sup> H NMR spectrum obtained from NMR scale reaction between CeN <sup>III</sup> <sub>3</sub> and LH <sub>2</sub> Br ( <b>3</b> ) ..... | 3  |
| LaLN <sup>III</sup> <sub>2</sub> ( <b>5</b> ) .....                                                                                            | 4  |
| CeLN <sup>III</sup> <sub>2</sub> ( <b>6</b> ) .....                                                                                            | 5  |
| NdLN <sup>III</sup> <sub>2</sub> ( <b>7</b> ) .....                                                                                            | 6  |
| Incomplete reaction between YN <sup>III</sup> <sub>3</sub> and LH with comparison to free LH .....                                             | 7  |
| Methine region of polymerisation reaction mixture after completion .....                                                                       | 8  |
| Contaminated <i>rac</i> -lactide .....                                                                                                         | 9  |
| <sup>1</sup> H NMR spectrum of reaction between YLN <sup>III</sup> Br ( <b>1</b> ) and BnOH .....                                              | 9  |
| GPC traces .....                                                                                                                               | 11 |
| YLN <sup>III</sup> Br .....                                                                                                                    | 11 |
| LaL <sub>2</sub> Br .....                                                                                                                      | 12 |
| (CeLN <sup>III</sup> Br) <sub>2</sub> .....                                                                                                    | 12 |
| (NdLN <sup>III</sup> Br) <sub>2</sub> .....                                                                                                    | 13 |
| LaLN <sup>III</sup> <sub>2</sub> .....                                                                                                         | 13 |
| CeLN <sup>III</sup> <sub>2</sub> .....                                                                                                         | 14 |
| NdLN <sup>III</sup> <sub>2</sub> .....                                                                                                         | 14 |
| YTp <sub>2</sub> N <sup>III</sup> .....                                                                                                        | 15 |
| X-Ray Crystallography .....                                                                                                                    | 17 |
| Crystallographic details .....                                                                                                                 | 17 |
| Structure of fluorenyl-tethered ligand bromide proligand ( <b>H<sub>2</sub>LBr</b> ) .....                                                     | 18 |
| Structures of additional (bis)amide complexes .....                                                                                            | 19 |
| LaLN <sup>III</sup> <sub>2</sub> ( <b>5</b> ) .....                                                                                            | 19 |
| <b>Table S1.</b> Selected bond lengths (Å) and bond angles (°) for fluorenyl-tethered-NHC rare earth complexes. ....                           | 20 |

|                                                                   |    |
|-------------------------------------------------------------------|----|
| <b>Table S2.</b> Additional crystallographic data .....           | 21 |
| <b>Table S2</b> continued. Additional crystallographic data ..... | 22 |
| APCI Mass spectrometry.....                                       | 23 |
| References .....                                                  | 23 |

## Experimental details and NMR spectra

Starting materials were used as received from Acros Organics, Alfa Aesar and Thermo Scientific. All NMR spectra were collected on a Bruker AVIIIHD 400 MHz spectrometer at 298 K at Heriot Watt University. All manipulations were carried out under a dry, oxygen-free dinitrogen atmosphere using standard Schlenk line techniques or in an MBRAUN UNIlab glovebox.  $^1\text{H}$  NMR spectra were recorded at 400 MHz and referenced to the residual solvent peak, 7.24 ppm for  $\text{CDCl}_3$  and 7.16 ppm for  $\text{C}_6\text{D}_6$ .  $^{13}\text{C}\{^1\text{H}\}$  NMR spectra were recorded at 101 MHz and referenced to the residual solvent peak, 128.62 ppm for  $\text{C}_6\text{D}_6$ . The Size Exclusion Chromatography analysis of polymers was carried using a Shimadzu High Performance Liquid Chromatograph fitted with a 7.5 mm internal diameter Agilent GPC column. The detector used was a Shimadzu RID-20A. HPLC grade tetrahydrofuran (THF, 99.8%, Acros Organics, Geel, Belgium) was utilized as the eluent with flow rate of 1 mL/min with an oven temperature of 30°C. The measurement was calibrated against ten polystyrene standards in the range of 162–364,000 g/mol and corrected using the Mark–Houwink parameters, PLA ( $K = 0.0549$ ,  $\alpha = 0.639$ ) and PS ( $K = 0.0125$ ,  $\alpha = 0.717$ ).<sup>1</sup> Tetrahydrofuran (THF), acetonitrile and toluene were obtained from an MBRAUN SP-300 solvent purification system; further to this, toluene was boiled over molten sodium, then collected and stored over activated 4 Å molecular sieves. Diethyl ether was received previously dried in an AcroSeal bottle and was transferred to a new vessel over 4 Å molecular sieves, residual gasses were then removed *via* 3 freeze-pump-thaw cycles.  $^n\text{BuLi}$  was titrated 3 times with menthol and 2,2'-bipyridine. Elemental analyses were performed by Orla McCullough at the London Metropolitan University, using a Flash 2000 Organic Elemental Analyzer, Thermo Scientific analyser. The samples for the measurements were prepared using V2O5 (to ensure complete combustion of all complexes) in tin capsules inside an inert argon glovebox atmosphere. Deuterated benzene was stirred over molten potassium and vacuum transferred prior to use. Compound **LH<sub>2</sub>Br** was synthesised as previously described.<sup>2</sup>  $\text{Ln}\{\text{N}(\text{SiMe}_3)_2\}_3$  ( $\text{Ln} = \text{Y, La, Ce, Nd}$ ) were synthesised from the reaction of anhydrous  $\text{LnCl}_3$  salts with  $\text{NaN}(\text{SiMe}_3)_2$  in THF, followed by toluene extraction and crystallisation.<sup>3</sup> *rac*-Lactide (Acros) was purified by recrystallisation from toluene followed by triple sublimation prior to use. Complex **1** was synthesised as previously described.<sup>4</sup> Complex **8** was synthesised as previously described.<sup>5</sup>

$^1\text{H}$  NMR spectrum obtained from NMR scale reaction between  $\text{CeN}''_3$  and  $\text{LH}_2\text{Br}$  (**3**)

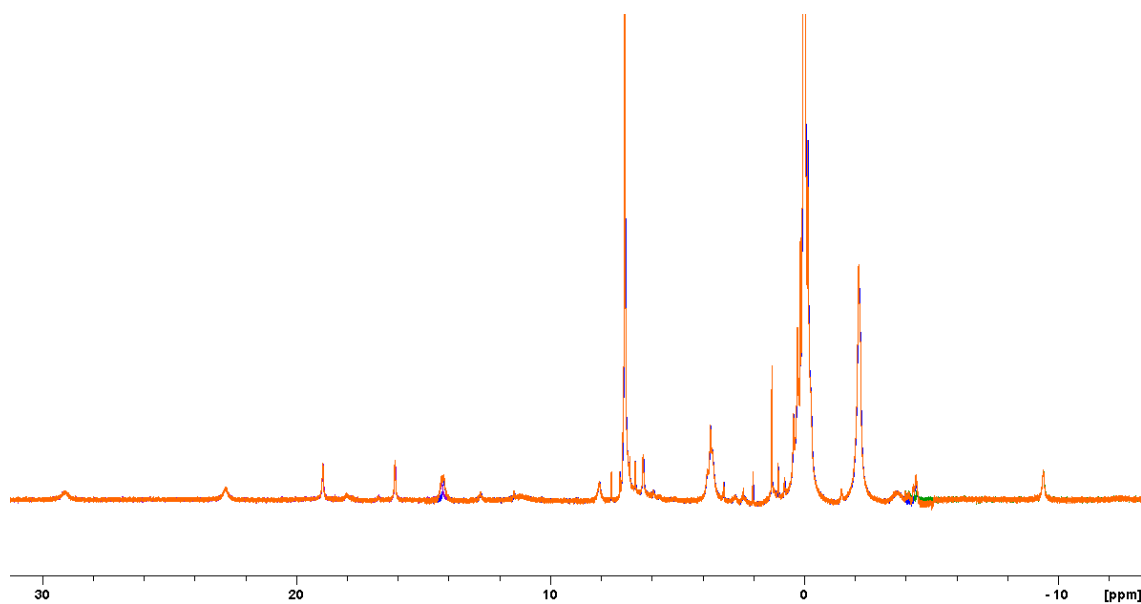

**Figure S1.** Merged  $^1\text{H}$  NMR (400.1 MHz, 298K,  $\text{C}_6\text{D}_6$ ) spectra from different sweep regions (35 – 15 ppm, 15 – -5 ppm and -5 – -25 ppm) for the reaction of  $\text{CeN}''_3$  and  $\text{LH}_2\text{Br}$  after 4 days at 80 °C.

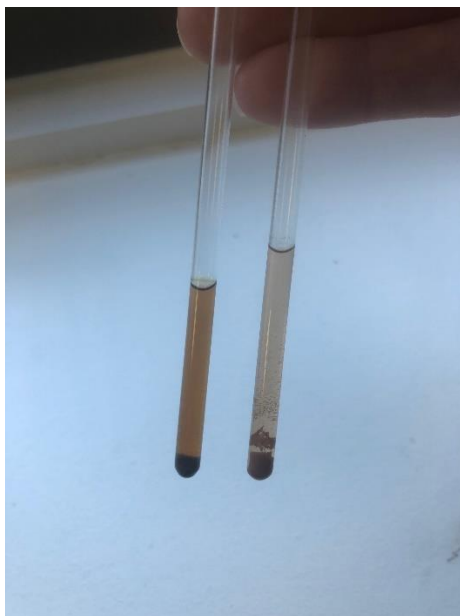

**Figure S2.** Attempts to redissolved **3** (LHS J. Young NMR tube) and **4** (RHS J. Young NMR tube) in  $\text{d}_8$ -THF revealed them to be very poorly soluble precluding the collection of NMR spectroscopic data on the isolated compounds.

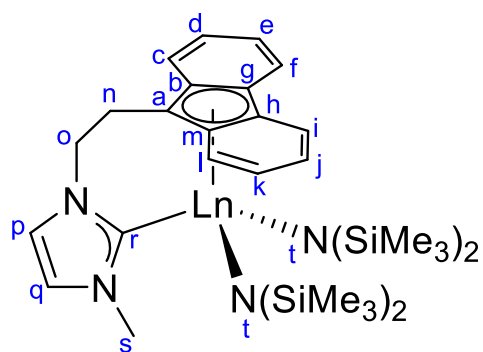

LaLN''<sub>2</sub>(**5**)

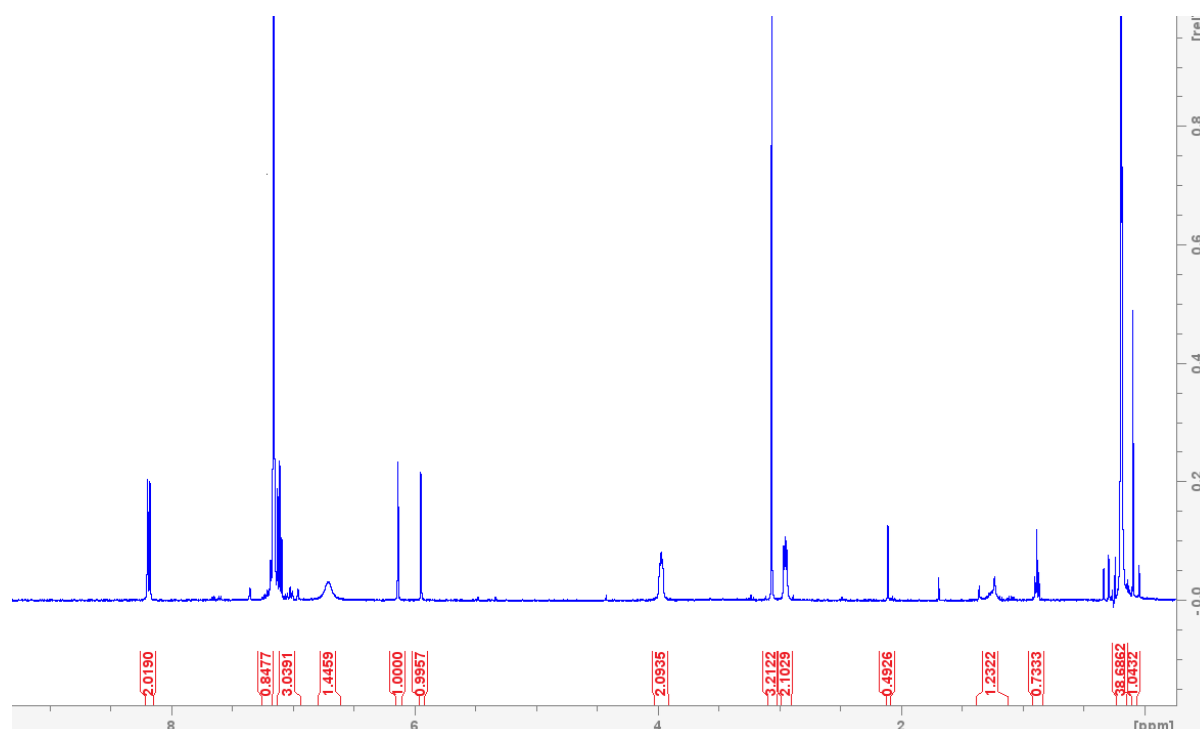

**Figure S3.** <sup>1</sup>H NMR (400.1 MHz, 298K, C<sub>6</sub>D<sub>6</sub>) spectrum of **5**.

<sup>1</sup>H NMR (400.1 MHz, 298K, C<sub>6</sub>D<sub>6</sub>) δ /ppm: 8.27 (d, J<sub>HH</sub> = 8.00 Hz 2H, H<sub>f</sub> & H<sub>i</sub>), 7.26-6.95 (m, 6H, H<sub>c</sub>-H<sub>f</sub> + H<sub>i</sub>-H<sub>l</sub>), 6.71 (br. s, 2H, H<sub>e</sub> & H<sub>j</sub>), 6.14 (d, J<sub>HH</sub> = 1.62 Hz 1H, H<sub>q</sub>), 5.95 (d, J<sub>HH</sub> = 1.59 Hz 1H, H<sub>r</sub>), 3.97 (m, 2H, H<sub>o</sub>), 3.06 (s, 3H, H<sub>s</sub>), 2.95 (m, 2H, H<sub>n</sub>), 0.19 (s, 36H, H<sub>t</sub>).

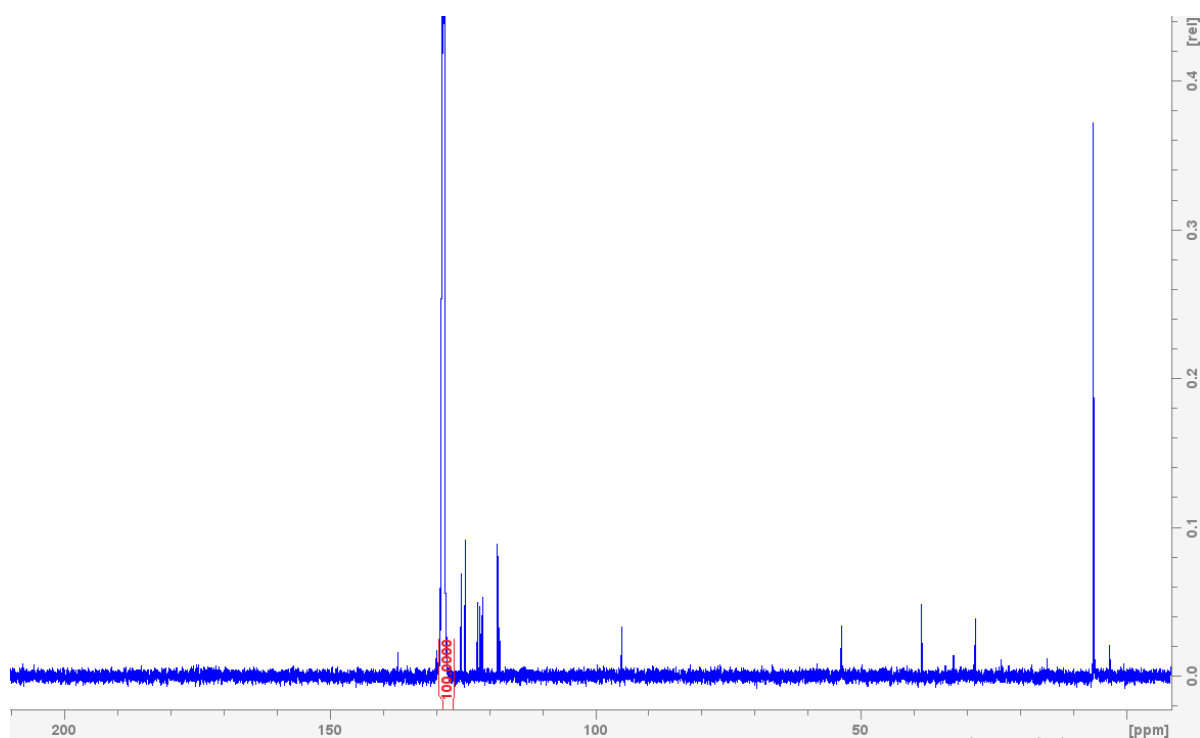

**Figure S4.**  $^{13}\text{C}\{^1\text{H}\}$  NMR (101 MHz, 298K,  $\text{C}_6\text{D}_6$ ) spectrum of **5**.

$\text{CeLN}''_2$  (**6**)

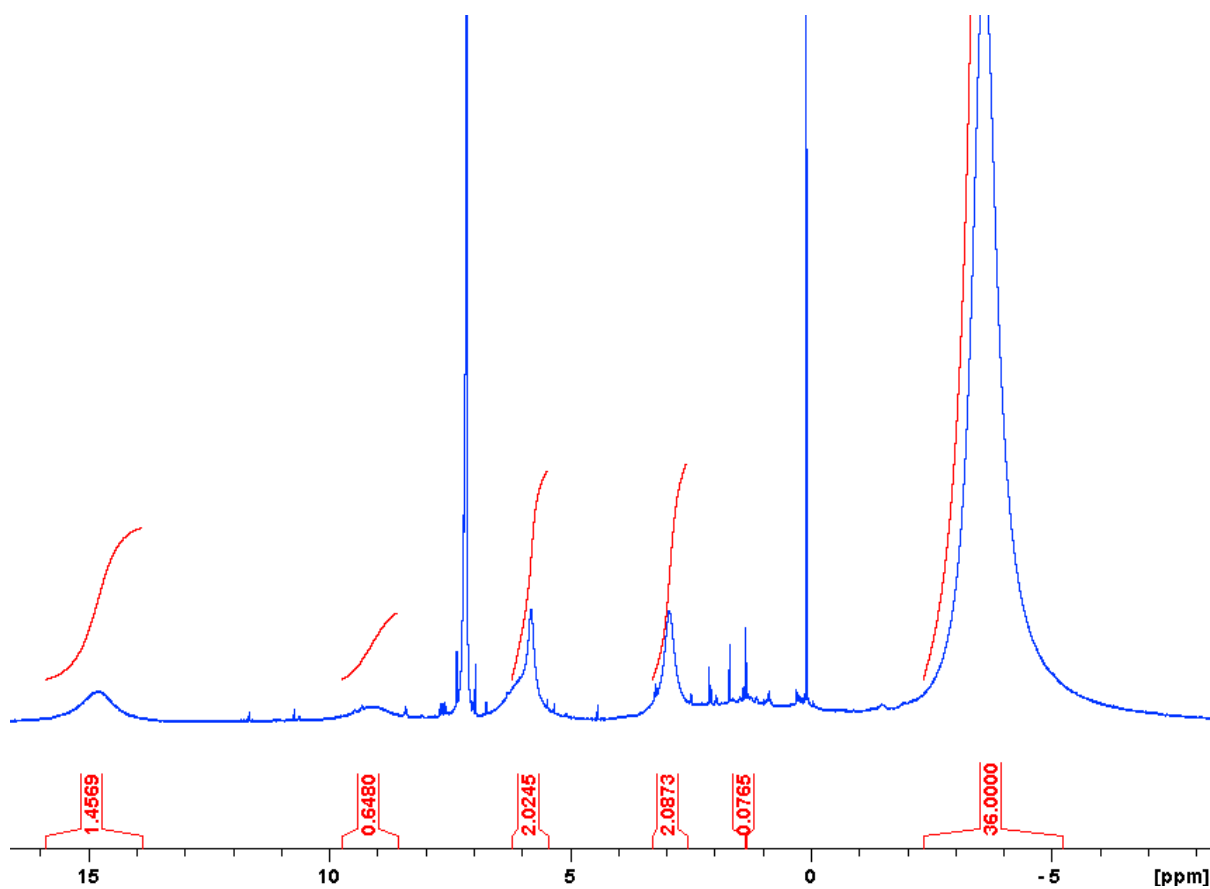

**Figure S5.**  $^1\text{H}$  NMR (400.1 MHz, 298K,  $\text{C}_6\text{D}_6$ ) of **6**. Additional peak at 0 ppm is from residual  $\text{HN}''$ .

NdLN<sup>III</sup><sub>2</sub> (**7**)

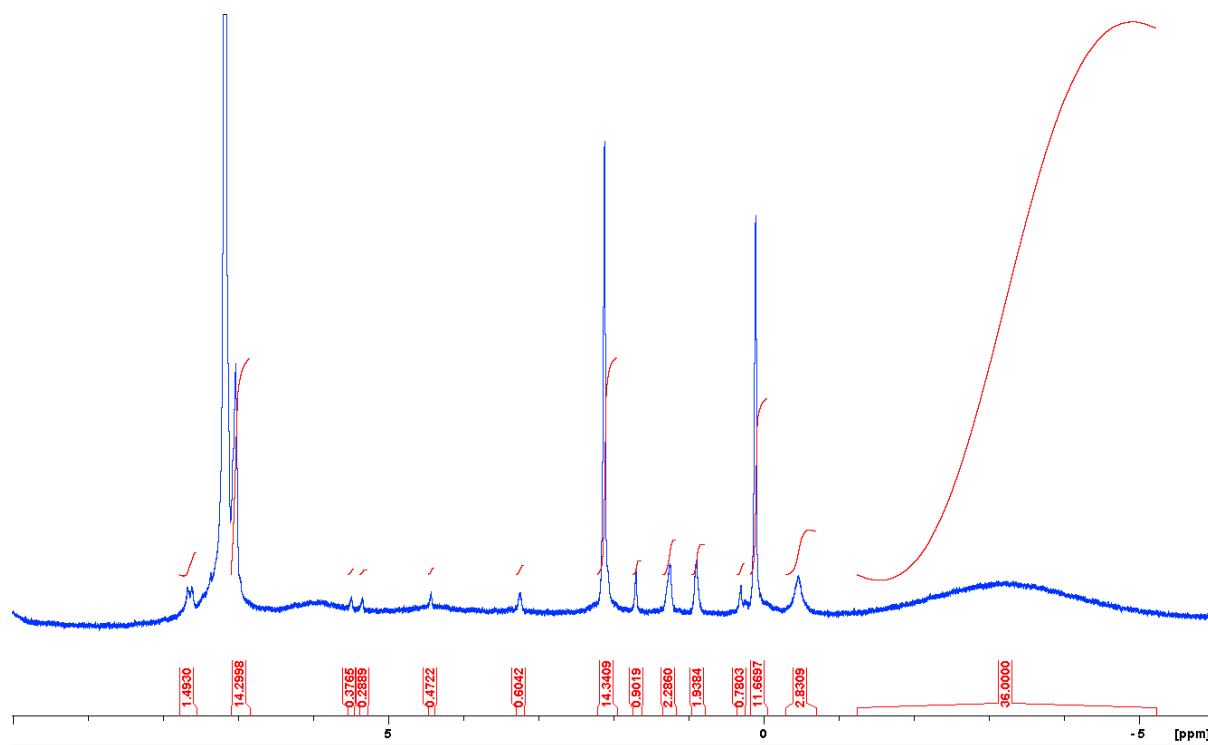

**Figure S6.** <sup>1</sup>H NMR (400.1 MHz, 298K, C<sub>6</sub>D<sub>6</sub>) of **7**. Additional peaks are from trace HN(SiMe<sub>3</sub>)<sub>2</sub> and solvent: 0.11 ppm (s, 12H, HN<sup>II</sup>), 2.11 ppm (s, 14H, toluene).

Incomplete reaction between  $\text{YN}''_3$  and LH with comparison to free LH

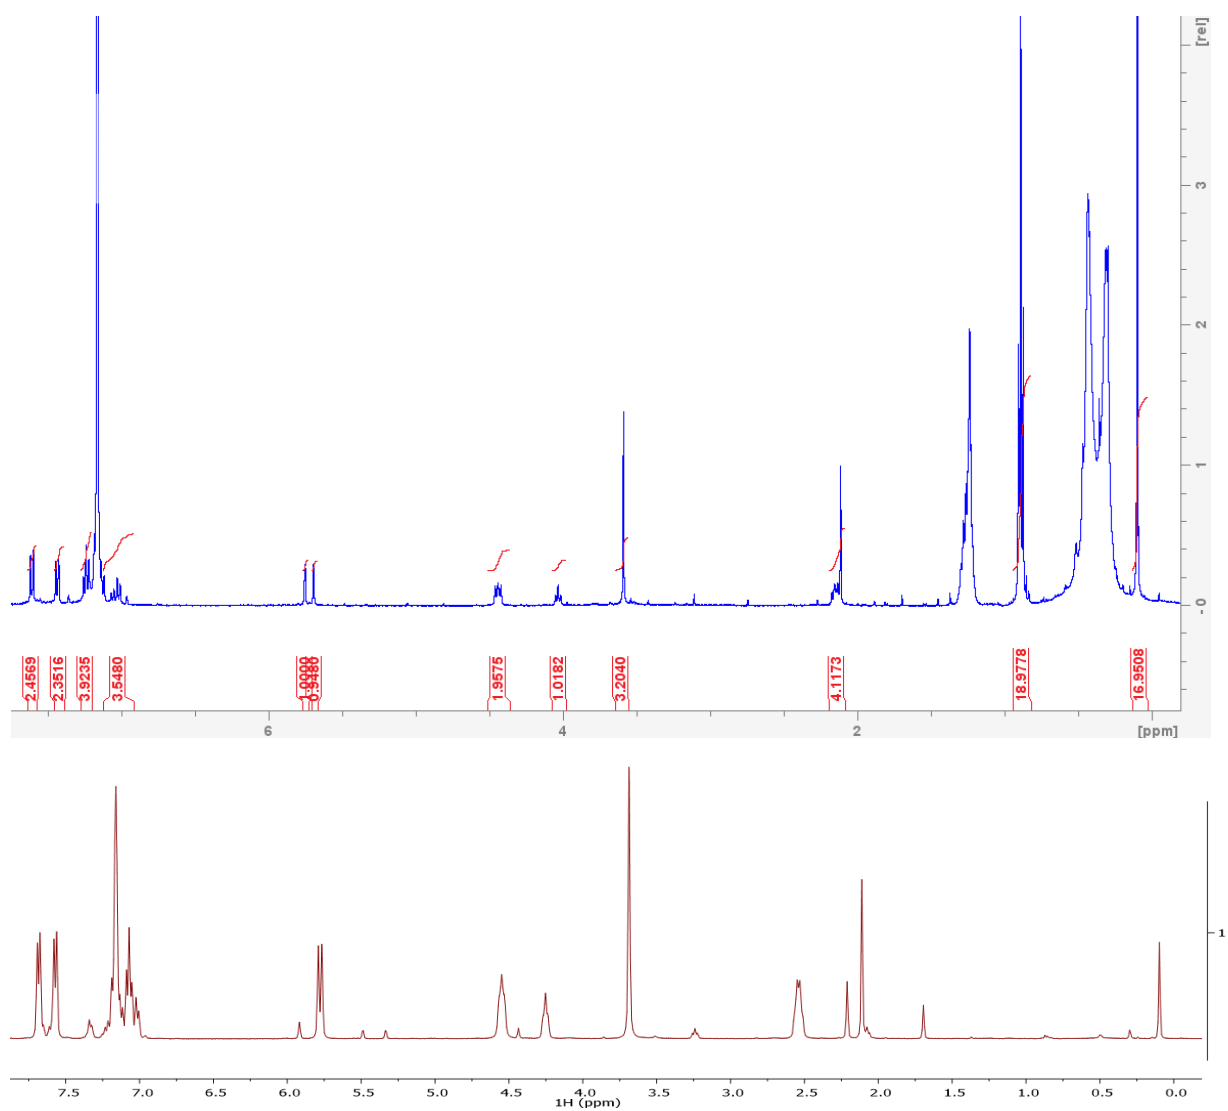

**Figure S7.**  $^1\text{H}$  NMR (400.1 MHz, 298K,  $\text{C}_6\text{D}_6$ ) spectrum of incomplete reaction between  $\text{YN}''_3$  and LH (free carbene,  $\text{C}_6\text{D}_6$  with n-hexane at 1.24 ppm, 0.89 ppm, top) and comparison with the reaction of  $\text{LH}_2\text{Br} + \text{LiN}''$  to form the free carbene LH (bottom). This shows that the free fluorene-tethered carbene has been formed not the anticipated yttrium complex.

Methine region of polymerisation reaction mixture after completion

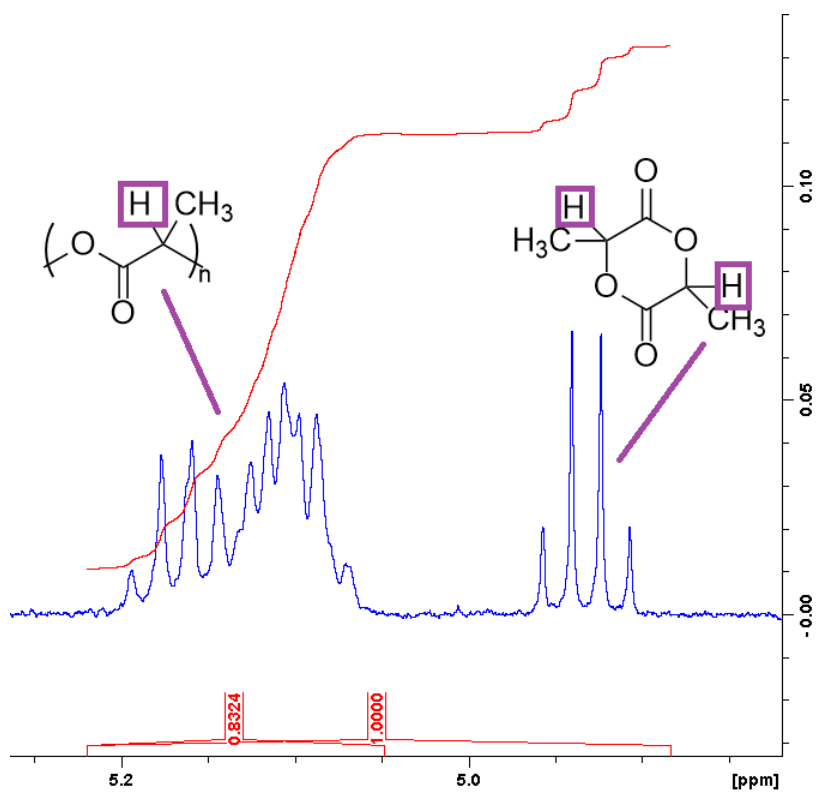

**Figure S8.** <sup>1</sup>H NMR spectrum (400 MHz, CDCl<sub>3</sub>, 298 K) methine region of an example crude reaction mixture after completion. The distinct quartet shows the C-H from unreacted *rac*-lactide while the multiplet shows the same proton in the polymer. Integration of the two peaks is used to determine conversion, in this case conversion is 83%.



Chemical structures and their corresponding  $^1\text{H}$  NMR peaks are shown:

- 2-methyl-2-oxiranecarboxylic acid** (epoxide):
  - Carboxylic acid proton:  $\delta$  11.000
  - Methine proton:  $\delta$  4.5074
  - Methyl group:  $\delta$  1.0090
- 2-methyl-1,3-dioxolane-4-carboxylic acid** (acetal):
  - Carboxylic acid proton:  $\delta$  11.000
  - Methine proton:  $\delta$  4.5074
  - Methyl group:  $\delta$  1.0090

The spectrum also shows the solvent peak for  $\text{CDCl}_3$  at  $\delta$  7.2641.

<sup>1</sup>H NMR spectrum of reaction between YLN"Br (**1**) and BnOH

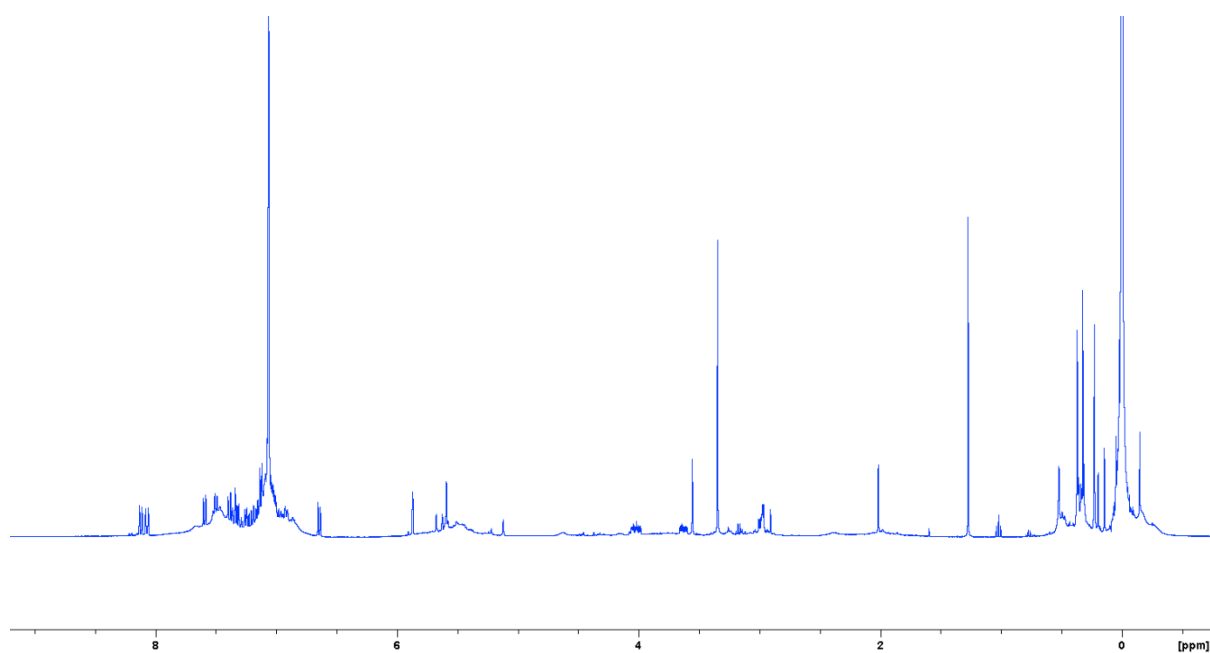

**Figure S11.**  $^1\text{H}$  NMR (400.1 MHz, 298K,  $\text{C}_6\text{D}_6$ ) spectrum of reaction between **1** and BnOH after 5 hours at room temperature

## GPC traces

Measurements were calibrated against ten polystyrene standards in the range of 162–364,000 g/mol and corrected using the Mark–Houwink parameters, PLA ( $K = 0.0549$ ,  $\alpha = 0.639$ ) and PS ( $K = 0.0125$ ,  $\alpha = 0.717$ ). Traces are shown up to 20 minutes, at which point molecular weights are of a negligible quantity indicating completion of the run.

YLN"Br

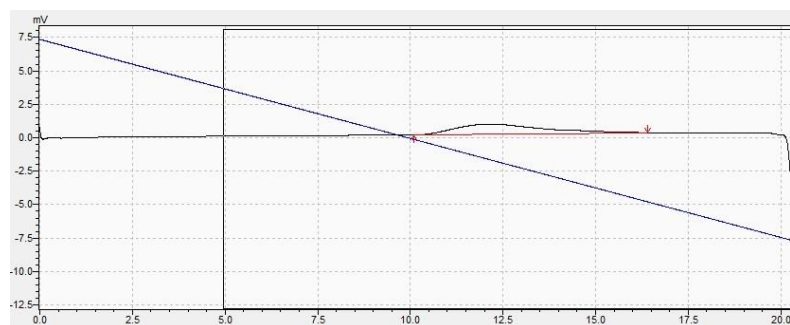

**Figure S12.** GPC trace for polymer product with YLN"Br (200:1, RT, 15 mins) as catalyst (Table 1, entry 1)

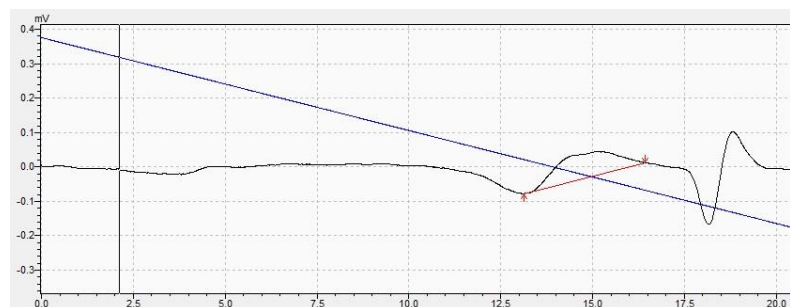

**Figure S13.** GPC trace for polymer product with YLN"Br (200:1, RT, 10 mins) as catalyst (Table 1, entry 2)

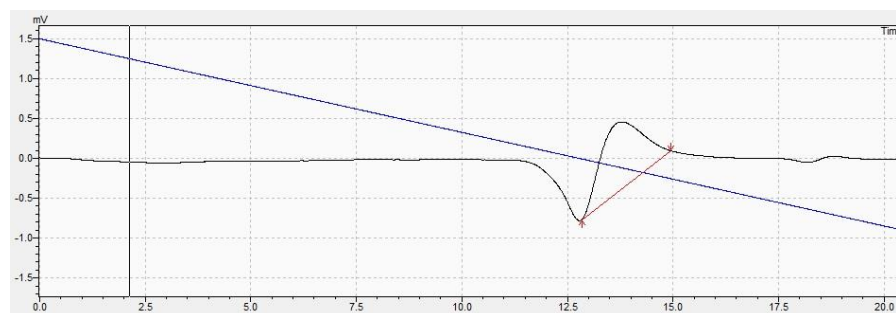

**Figure S14.** GPC trace for polymer product with YLN"Br (400:1, RT, 20 mins) as catalyst (Table 1, entry 3)

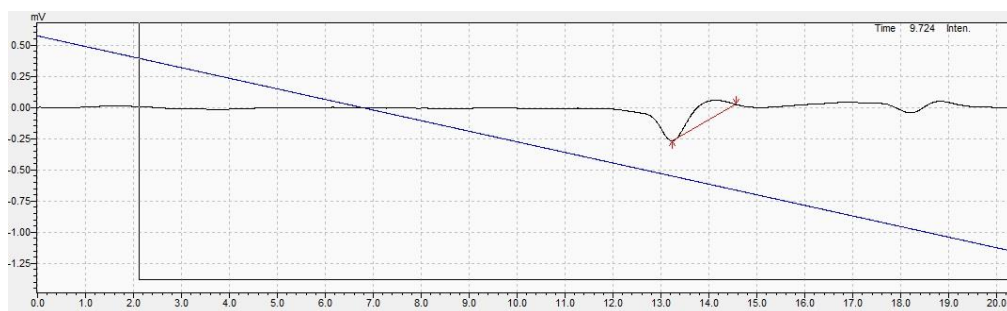

**Figure S15.** GPC trace for polymer product with YLN"Br (800:1, RT, 30 mins) as catalyst (Table 1, entry 4)

LaL<sub>2</sub>Br

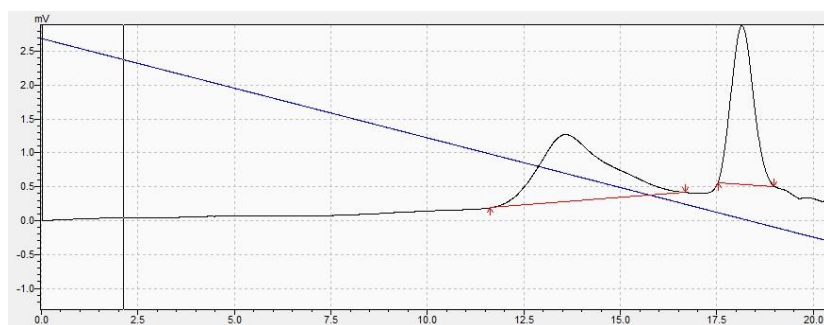

**Figure S16.** GPC trace for polymer product with LaL<sub>2</sub>Br (200:1, RT, 15 mins) as catalyst (Table 1, entry 5)

(CeLN"Br)<sub>2</sub>

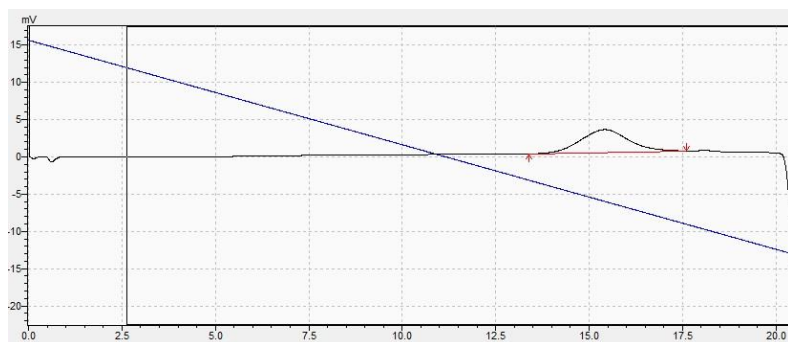

**Figure S17.** GPC trace for polymer product with (CeLN"Br)<sub>2</sub> (200:1, RT, 15 mins) as catalyst (Table 1, entry 6)

(NdLN<sup>III</sup>Br)<sub>2</sub>

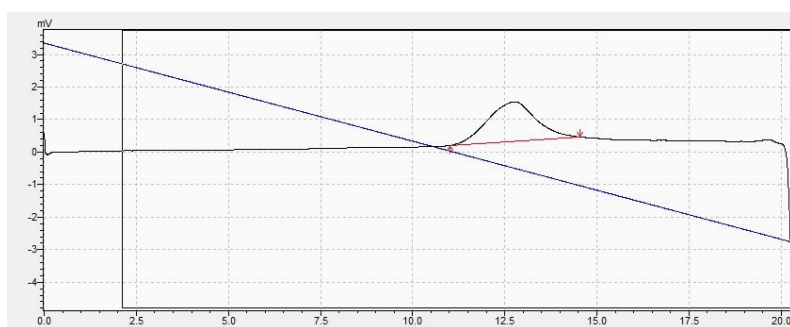

**Figure S18.** GPC trace for polymer product with (NdLN<sup>III</sup>Br)<sub>2</sub> (200:1, RT, 15 mns) as catalyst (Table 1, entry 7)

LaLN<sup>III</sup><sub>2</sub>

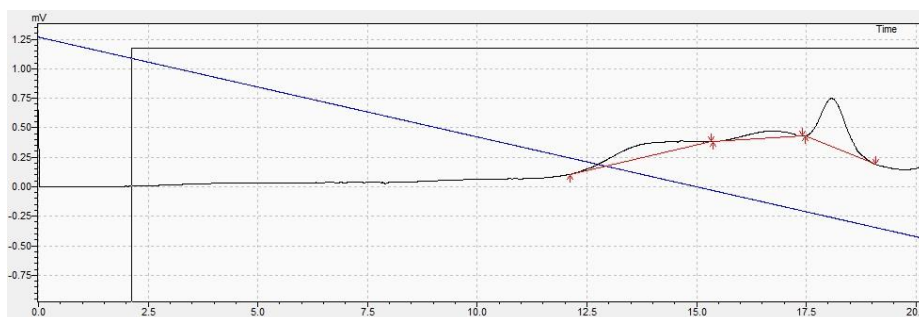

**Figure S19.** GPC trace for polymer product with LaLN<sup>III</sup><sub>2</sub> (200:1, RT, 10 mins) as catalyst (Table 1, entry 9)

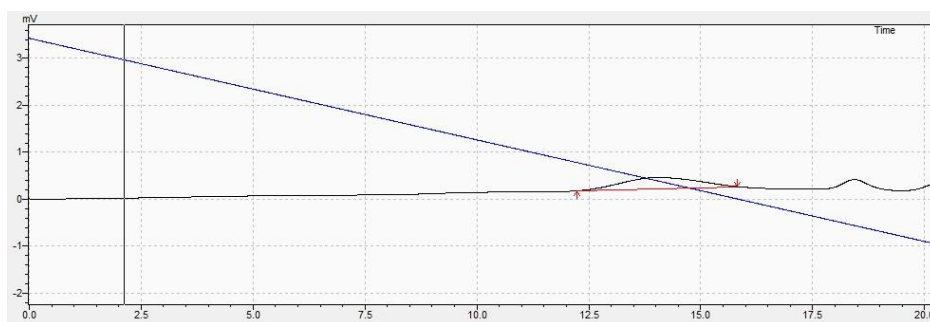

**Figure S20.** GPC trace for polymer product with LaLN<sup>III</sup><sub>2</sub> (400:1, RT, 15 mins) as catalyst (Table 1, entry 10)

CeLN<sup>III</sup><sub>2</sub>

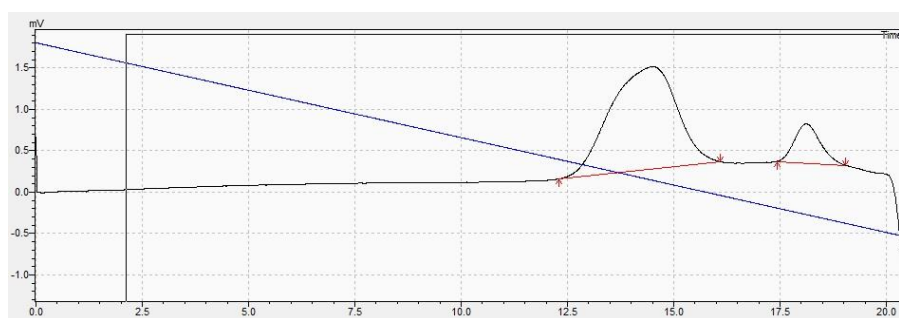

**Figure S21.** GPC trace for polymer product with CeLN<sup>III</sup><sub>2</sub> (200:1, RT, 5 mins) as catalyst (Table 1, entry 11)

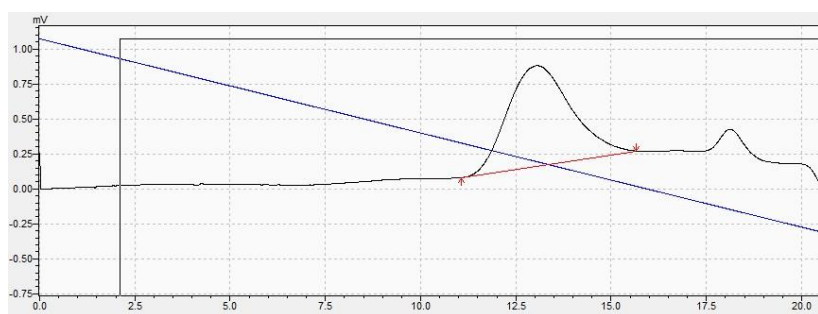

**Figure S22.** GPC trace for polymer product with CeLN<sup>III</sup><sub>2</sub> (400:1, RT, 10 mins) as catalyst (Table 1, entry 12)

NdLN<sup>III</sup><sub>2</sub>

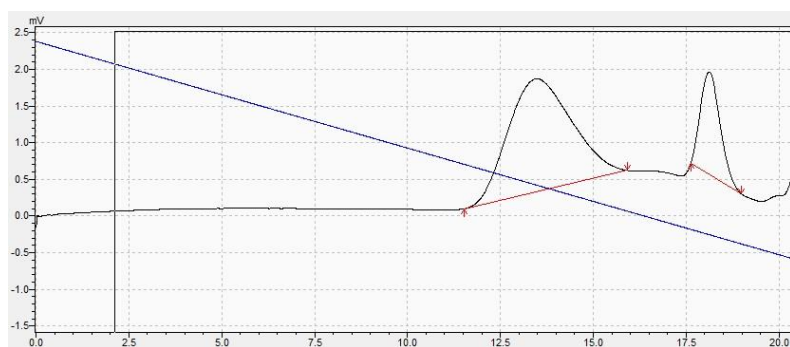

**Figure S23.** GPC trace for polymer product with NdLN<sup>III</sup><sub>2</sub> (200:1, RT, 10 mins) as catalyst (Table 1, entry 13)

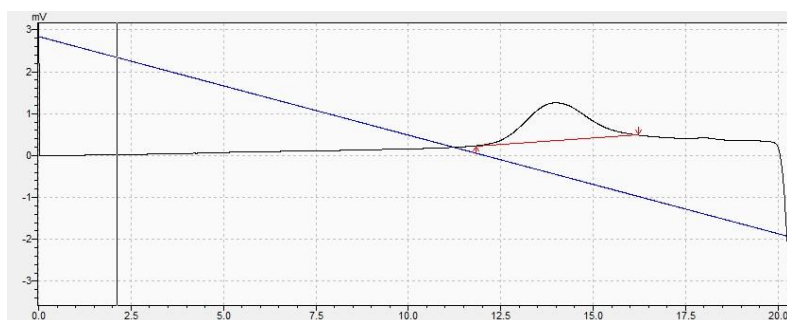

**Figure S24.** GPC trace for polymer product with  $\text{NdLN}''_2$  (800:1, RT, 15 mins) as catalyst (Table 1, entry 14)

$\text{YTp}_2\text{N}''$

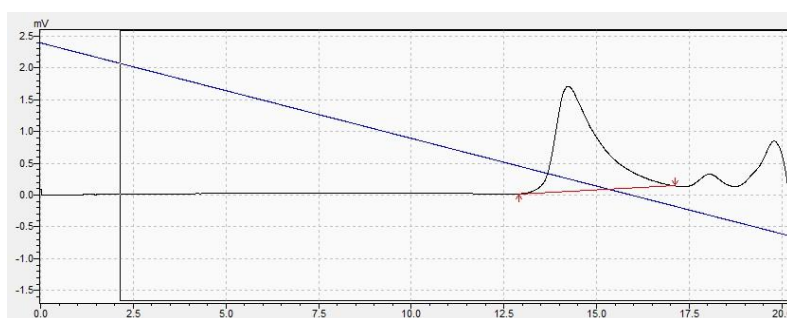

**Figure S25.** GPC trace for polymer product with  $\text{YTp}_2\text{N}''$  (200:1, 60 °C, 16 h) as catalyst (Table 1, entry 16)

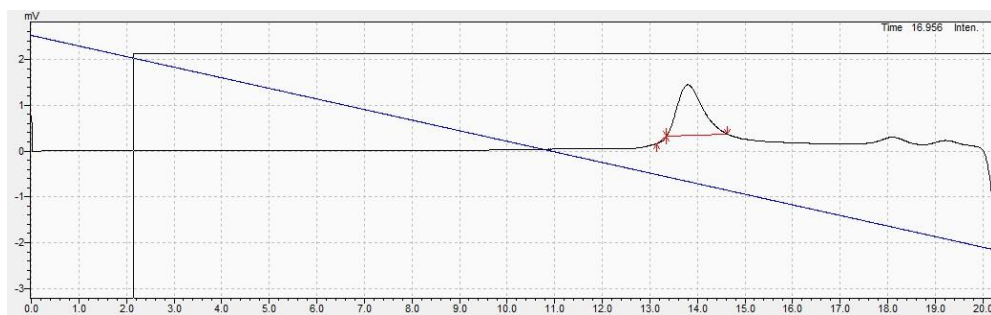

**Figure S26.** GPC trace for polymer product with  $\text{YTp}_2\text{N}''$  (400:1, 60 °C, 16 h) as catalyst (Table 1, entry 17)

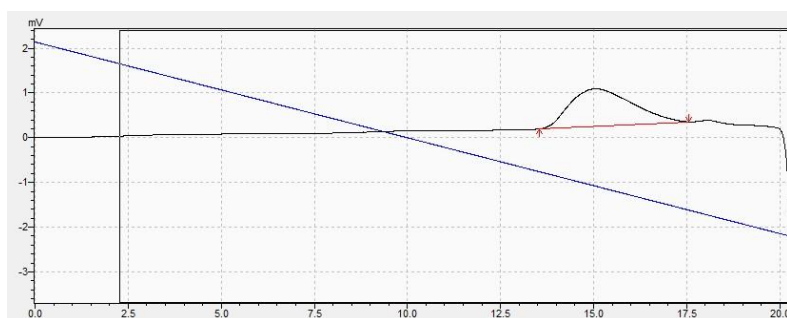

**Figure S27.** GPC trace for polymer product with  $\text{YTp}_2\text{N}''$  (800:1, 60 °C, 16 h) as catalyst (Table 1, entry 18)

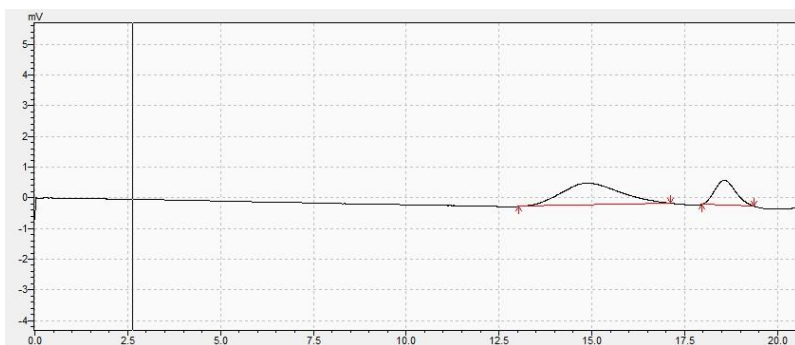

**Figure S28.** GPC trace for polymer product with YTp<sub>2</sub>N'' (200:1, 80 °C, 16 h) as catalyst (Table 1, entry 19)

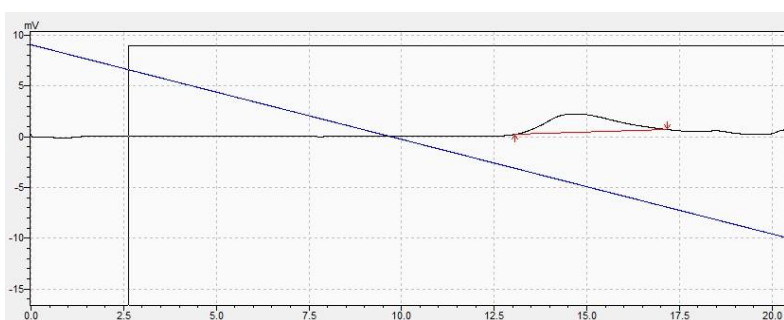

**Figure S29.** GPC trace for polymer product with YTp<sub>2</sub>N'' (400:1, 80 °C, 16 h) as catalyst (Table 1, entry 20)

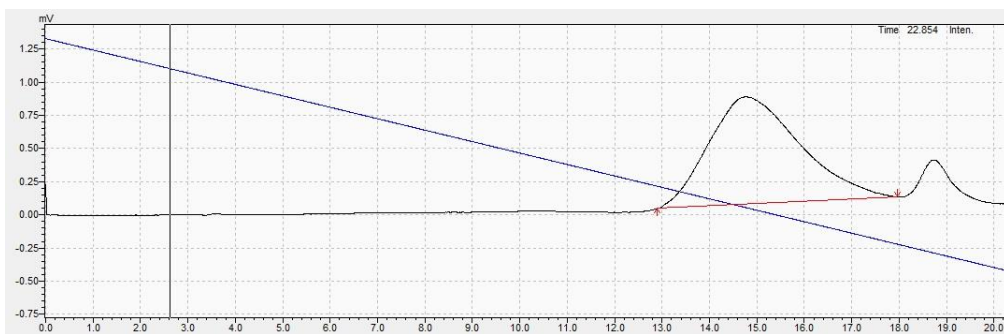

**Figure S30.** GPC trace for polymer product with YTp<sub>2</sub>N'' (800:1, 80 °C, 16 h) as catalyst (Table 1, entry 21)



## X-Ray Crystallography

### Crystallographic details

Single crystals suitable for x-ray diffraction were covered in inert oil and placed under the cold stream of a Bruker D8 Venture diffractometer at 100 K. Exposures were collected using Cu-K $\alpha$  ( $\lambda$  = 1.54178 Å). Indexing, data collection and absorption corrections were performed. The structures were then solved using SHELXT<sup>6</sup> and refined by full-matrix least-squares refinement (SHELXL)<sup>5</sup> interfaced with the programme OLEX2.<sup>7</sup>

The structures for all LnLn''<sub>2</sub> compounds (Ln = La, Ce and Nd in this paper, Ln = La in *P*-1 in a previous paper)<sup>4</sup> all feature large Q peaks next to the metal centres. This is despite crystallising in several different space groups (Ln = La in this paper: *Pca*2<sub>1</sub>, Ln = Ce: *P*2<sub>1</sub>/*c*, Ln = Nd: *Pca*2<sub>1</sub>) and collecting several datasets. We have looked for non-merohedral twinning but have not been able to model the data any better than that presented here. We have used Cu radiation, which, although not ideal for heavy atoms, has worked satisfactorily with small crystals of other rare earth complexes (for example, the Ce Br bridged structure in this paper and the Nd Br bridged structure in a previous paper).<sup>4</sup> We are therefore unable to confirm whether the problem is exclusively absorption related or if the problem is inherent with the way this class of compounds crystallise. We present the data and draw conclusions only about the connectivity of the structures **5 – 7**.

Structure of fluorenyl-tethered ligand bromide proligand (**H<sub>2</sub>LBr**)

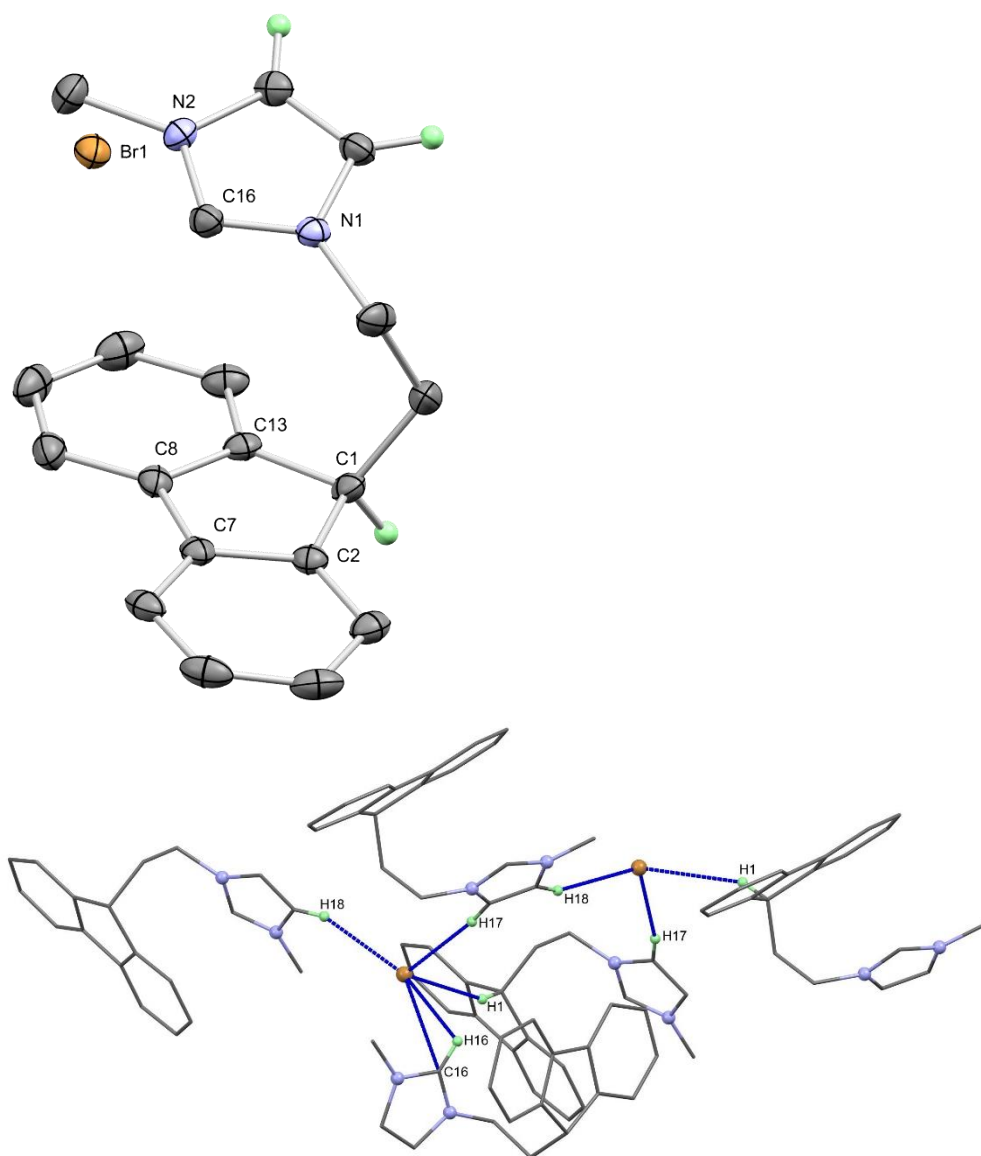

**Figure S31.** Molecular structure (top) and secondary interactions (bottom) of  $[(C_{13}H_9)C_2H_4N(CH)C_2H_2N(Me)][Br]$  (**H<sub>2</sub>LBr**) with thermal ellipsoids at 50% probability and all H atoms except for NHC backbone and Flu-H1 have been removed for clarity (top).

Structures of additional (bis)amide complexes

LaLN<sup>2</sup><sub>2</sub> (**5**)

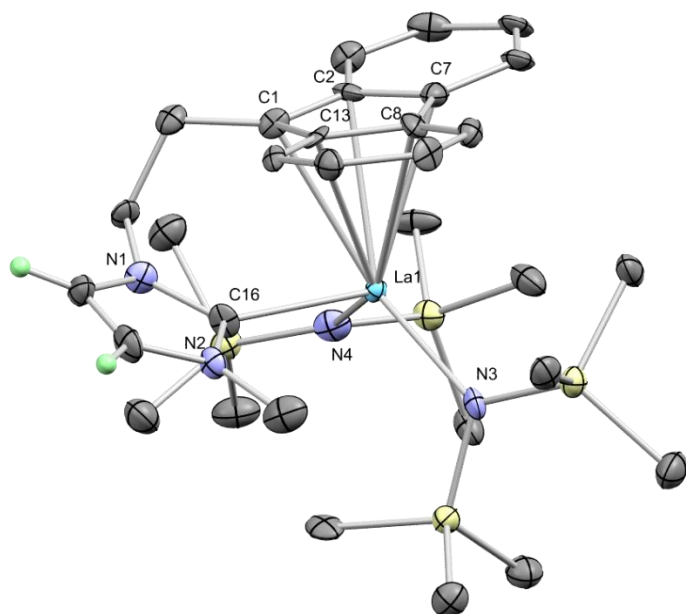

**Figure S32.** Molecular structure of LaLN<sup>2</sup><sub>2</sub> (**5**) with thermal ellipsoids at 50% probability. All H atoms except for NHC backbone have been removed for clarity.

**Table S1.** Selected bond lengths (Å) and bond angles (°) for fluorenyl-tethered-NHC rare earth complexes.

| Bond(s)         | <b>1 (Y)<sup>a</sup></b> | <b>3 (Ce)</b> | <b>4 (Nd)<sup>a</sup></b> |
|-----------------|--------------------------|---------------|---------------------------|
| Ln1-C1          | 2.6347(15)               | 2.845(2)      | 2.796(2)                  |
| Ln1-C2          | 2.6765(14)               | 2.928(2)      | 2.847(2)                  |
| Ln1-C7          | 2.6726(15)               | 2.949 (2)     | 2.869(2)                  |
| Ln1-C8          | 2.6676(15)               | 2.899 (2)     | 2.915(2)                  |
| Ln1-C13         | 2.6786(15)               | 2.884(2)      | 2.886(2)                  |
| Ln1-C16         | 2.4780(15)               | 2.676(2)      | 2.639(2)                  |
| Ln1-N3          | 2.2082(13)               | 2.3357(15)    | 2.3050(17)                |
| Ln1-N4          | -                        | -             | -                         |
| Ln1-Br1         | 2.7219(2)                | 2.9941(2)     | 2.9541(3)                 |
| Ln1-Br1'        |                          | 3.0383(2)     | 3.0053(3)                 |
| Centroid-Ln-C16 | 103.5                    | 93.3          | 94.2                      |
| C16-Ln-N3       | 100.63(5)                | 124.25(6)     | 122.21(7)                 |
| C16-Ln-N4       | -                        | -             | -                         |
| N3-Ln-N4        | -                        | -             | -                         |

<sup>a</sup> Structure published previously.<sup>4</sup>

**Table S2.** Additional crystallographic data

|                                                              | LH <sub>2</sub> Br                                                           | <b>3</b> {CeL(Br)N"} <sub>2</sub>                                                              |
|--------------------------------------------------------------|------------------------------------------------------------------------------|------------------------------------------------------------------------------------------------|
| Empirical formula                                            | C <sub>19</sub> H <sub>19</sub> BrN <sub>2</sub>                             | C <sub>50</sub> H <sub>70</sub> Br <sub>2</sub> Ce <sub>2</sub> N <sub>6</sub> Si <sub>4</sub> |
| Formula weight                                               | 355.27                                                                       | 1307.54                                                                                        |
| T/K                                                          | 100.0                                                                        | 100.0                                                                                          |
| Crystal system                                               | orthorhombic                                                                 | monoclinic                                                                                     |
| Space group                                                  | <i>P</i> 2 <sub>1</sub> 2 <sub>1</sub> 2 <sub>1</sub>                        | <i>P</i> 2 <sub>1</sub> / <i>n</i>                                                             |
| <i>a</i> /Å                                                  | 11.1141(2)                                                                   | 11.4996(3)                                                                                     |
| <i>b</i> /Å                                                  | 12.0398(3)                                                                   | 11.3835(3)                                                                                     |
| <i>c</i> /Å                                                  | 12.4524(3)                                                                   | 21.0457(5)                                                                                     |
| $\alpha$ /°                                                  | 90                                                                           | 90                                                                                             |
| $\beta$ /°                                                   | 90                                                                           | 95.4860(10)                                                                                    |
| $\gamma$ /°                                                  | 90                                                                           | 90                                                                                             |
| Volume/Å <sup>3</sup>                                        | 1666.27(7)                                                                   | 2742.38(12)                                                                                    |
| <i>Z</i>                                                     | 4                                                                            | 2                                                                                              |
| $\rho_{\text{calc}}$ /cm <sup>3</sup>                        | 1.416                                                                        | 1.583                                                                                          |
| $\mu$ /mm <sup>1</sup>                                       | 3.329                                                                        | 15.494                                                                                         |
| <i>F</i> (000)                                               | 728.0                                                                        | 1308.0                                                                                         |
| Crystal size/mm <sup>3</sup>                                 | 0.31 × 0.25 × 0.2                                                            | 0.18 × 0.06 × 0.04                                                                             |
| Radiation                                                    | CuK $\alpha$ ( $\lambda$ = 1.54178)                                          | CuK $\alpha$ ( $\lambda$ = 1.54178)                                                            |
| 2 $\Theta$ range for data collection/°                       | 10.22 to 144.37                                                              | 8.44 to 144.278                                                                                |
| Index ranges                                                 | -13 ≤ <i>h</i> ≤ 13, -14 ≤ <i>k</i> ≤ 13, -15 ≤ <i>l</i> ≤ 13                | -14 ≤ <i>h</i> ≤ 14, -13 ≤ <i>k</i> ≤ 14, -25 ≤ <i>l</i> ≤ 24                                  |
| Reflections collected                                        | 29705                                                                        | 30621                                                                                          |
| Independent reflections                                      | 3273 [ <i>R</i> <sub>int</sub> = 0.0305, <i>R</i> <sub>sigma</sub> = 0.0170] | 5386 [ <i>R</i> <sub>int</sub> = 0.0339, <i>R</i> <sub>sigma</sub> = 0.0250]                   |
| Data/ restraints/ parameters                                 | 3273/0/200                                                                   | 5386/0/296                                                                                     |
| Goodness-of-fit on <i>F</i> <sup>2</sup>                     | 1.108                                                                        | 1.064                                                                                          |
| Final <i>R</i> indexes [ <i>I</i> ≥ 2 $\sigma$ ( <i>I</i> )] | <i>R</i> <sub>1</sub> = 0.0196, <i>wR</i> <sub>2</sub> = 0.0479              | <i>R</i> <sub>1</sub> = 0.0191, <i>wR</i> <sub>2</sub> = 0.0480                                |
| Final <i>R</i> indexes [all data]                            | <i>R</i> <sub>1</sub> = 0.0197, <i>wR</i> <sub>2</sub> = 0.0480              | <i>R</i> <sub>1</sub> = 0.0194, <i>wR</i> <sub>2</sub> = 0.0481                                |
| Largest diff. peak/hole (e Å <sup>-3</sup> )                 | 0.18/-0.33                                                                   | 0.74/-0.83                                                                                     |
| Flack parameter                                              | -0.029(6)                                                                    | N/A                                                                                            |
| CSD deposition numbers                                       | 2401175                                                                      | 2401176                                                                                        |

**Table S2** continued. Additional crystallographic data

|                                                              | <b>5</b> LaLN'' <sub>2</sub>                                                 | <b>6</b> CeLN'' <sub>2</sub>                                                 | <b>7</b> NdLN'' <sub>2</sub>                                                 |
|--------------------------------------------------------------|------------------------------------------------------------------------------|------------------------------------------------------------------------------|------------------------------------------------------------------------------|
| Empirical formula                                            | C <sub>31</sub> H <sub>53</sub> LaN <sub>4</sub> Si <sub>4</sub>             | C <sub>31</sub> H <sub>53</sub> CeN <sub>4</sub> Si <sub>4</sub>             | C <sub>31</sub> H <sub>53</sub> N <sub>4</sub> NdSi <sub>4</sub>             |
| Formula weight                                               | 733.04                                                                       | 734.25                                                                       | 738.37                                                                       |
| T/K                                                          | 100.0                                                                        | 100.0                                                                        | 100.0                                                                        |
| Crystal system                                               | orthorhombic                                                                 | monoclinic                                                                   | orthorhombic                                                                 |
| Space group                                                  | <i>Pca</i> 2 <sub>1</sub>                                                    | <i>P</i> 2 <sub>1</sub> / <i>c</i>                                           | <i>Pca</i> 2 <sub>1</sub>                                                    |
| <i>a</i> /Å                                                  | 12.9434(2)                                                                   | 18.1504(6)                                                                   | 12.9276(2)                                                                   |
| <i>b</i> /Å                                                  | 16.4994(2)                                                                   | 11.7451(4)                                                                   | 16.4136(3)                                                                   |
| <i>c</i> /Å                                                  | 16.8840(2)                                                                   | 19.4041(7)                                                                   | 16.8458(3)                                                                   |
| $\alpha$ /°                                                  | 90                                                                           | 90                                                                           | 90                                                                           |
| $\beta$ /°                                                   | 90                                                                           | 116.065(2)                                                                   | 90                                                                           |
| $\gamma$ /°                                                  | 90                                                                           | 90                                                                           | 90                                                                           |
| Volume/Å <sup>3</sup>                                        | 3605.72(8)                                                                   | 3715.8(2)                                                                    | 3574.48(11)                                                                  |
| <i>Z</i>                                                     | 4                                                                            | 4                                                                            | 4                                                                            |
| $\rho_{\text{calc}}$ /g/cm <sup>3</sup>                      | 1.350                                                                        | 1.312                                                                        | 1.372                                                                        |
| $\mu$ /mm <sup>1</sup>                                       | 10.616                                                                       | 10.882                                                                       | 12.555                                                                       |
| <i>F</i> (000)                                               | 1520.0                                                                       | 1524.0                                                                       | 1532.0                                                                       |
| Crystal size/mm <sup>3</sup>                                 | 0.181 × 0.167 × 0.149                                                        | 0.17 × 0.16 × 0.04                                                           | 0.18 × 0.08 × 0.03                                                           |
| Radiation                                                    | CuK $\alpha$ ( $\lambda$ = 1.54178)                                          | CuK $\alpha$ ( $\lambda$ = 1.54178)                                          | CuK $\alpha$ ( $\lambda$ = 1.54178)                                          |
| 2 $\Theta$ range for data collection/°                       | 5.234 to 143.972                                                             | 5.42 to 145.36                                                               | 5.246 to 144.332                                                             |
| Index ranges                                                 | -15 ≤ <i>h</i> ≤ 15, -20 ≤ <i>k</i> ≤ 20, -20 ≤ <i>l</i> ≤ 20                | -22 ≤ <i>h</i> ≤ 21, -14 ≤ <i>k</i> ≤ 13, -23 ≤ <i>l</i> ≤ 23                | -15 ≤ <i>h</i> ≤ 15, -20 ≤ <i>k</i> ≤ 20, -20 ≤ <i>l</i> ≤ 20                |
| Reflections collected                                        | 80345                                                                        | 90837                                                                        | 76590                                                                        |
| Independent reflections                                      | 7433 [ <i>R</i> <sub>int</sub> = 0.0737, <i>R</i> <sub>sigma</sub> = 0.0354] | 7339 [ <i>R</i> <sub>int</sub> = 0.0685, <i>R</i> <sub>sigma</sub> = 0.0282] | 7357 [ <i>R</i> <sub>int</sub> = 0.0695, <i>R</i> <sub>sigma</sub> = 0.0332] |
| Data/ restraints/ parameters                                 | 7433/13/377                                                                  | 7339/0/374                                                                   | 7357/1/377                                                                   |
| Goodness-of-fit on <i>F</i> <sup>2</sup>                     | 1.058                                                                        | 1.062                                                                        | 1.018                                                                        |
| Final <i>R</i> indexes [ <i>I</i> ≥ 2 $\sigma$ ( <i>I</i> )] | <i>R</i> <sub>1</sub> = 0.0704, <i>wR</i> <sub>2</sub> = 0.1775              | <i>R</i> <sub>1</sub> = 0.0724, <i>wR</i> <sub>2</sub> = 0.2005              | <i>R</i> <sub>1</sub> = 0.0698, <i>wR</i> <sub>2</sub> = 0.1775              |
| Final <i>R</i> indexes [all data]                            | <i>R</i> <sub>1</sub> = 0.0765, <i>wR</i> <sub>2</sub> = 0.1833              | <i>R</i> <sub>1</sub> = 0.0770, <i>wR</i> <sub>2</sub> = 0.2037              | <i>R</i> <sub>1</sub> = 0.0730, <i>wR</i> <sub>2</sub> = 0.1819              |
| Largest diff. peak/hole (e Å <sup>-3</sup> )                 | 9.96/-2.79                                                                   | 7.72/-1.60                                                                   | 6.37/-3.75                                                                   |
| Flack parameter                                              | *                                                                            | N/A                                                                          | *                                                                            |
| CSD deposition numbers                                       | 2401177                                                                      | 2401178                                                                      | 2401179                                                                      |

\* These were refined as two component twins, with relative ratios for **5** LaLN''<sub>2</sub> of 0.628(10) {Flack: 0.0014(19)} and 0.370(10) {Flack: 0.0008(19)} and for **7** NdLN''<sub>2</sub> of 0.858(7) {Flack: 0.0004(9)} and 0.142(7) {Flack: -0.0000(9)}.

## APCI Mass spectrometry

Spectrum RT 5.11 - 5.41 {7 scans} - Background Subtracted 4.31  
105A\_Scan1\_is1;  
APCI + Settings for tune mix using source type APCI Positive. Max: 9.7E7

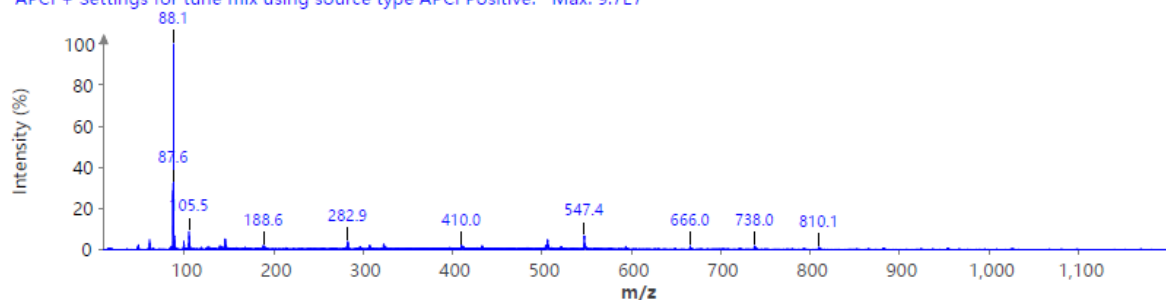

**Figure S33.** APCI Mass spectrum of polymer product from reaction of  $\text{LaL}_2\text{Br}$  (200:1, RT, 15 mins) as catalyst (Table 1, entry 5)

Spectrum RT 7.33 - 7.45 {5 scans} - Background Subtracted 6.45 - 7.20  
169B3;  
APCI + Settings for tune mix using source type APCI Positive. Max: 2.7E8

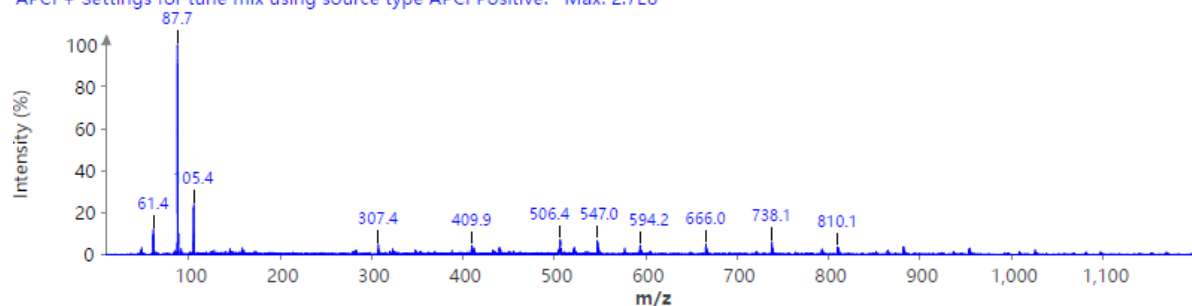

**Figure S34.** APCI Mass spectrum of polymer product from reaction of  $\text{NdLN}_2$  (200:1, RT, 10 mins) as catalyst (Table 1, entry 13)

## References

1. P. Dubois, C. Jacobs, R. Jerome and P. Teyssie, *Macromolecules*, 1991, **24**, 2266-2270.
2. K. J. Evans, C. L. Campbell, M. F. Haddow, C. Luz, P. A. Morton and S. M. Mansell, *Eur. J. Inorg. Chem.*, 2019, **2019**, 4894-4901.
3. W. A. Herrmann and F. T. Edelmann, *Synthetic Methods of Organometallic and Inorganic Chemistry: Lanthanides and Actinides*, Thieme Medical Pub, 1996.
4. K. J. Evans, P. A. Morton, C. Sangster and S. M. Mansell, *Polyhedron*, 2021, **197**.
5. T. Chowdhury, S. J. Horsewill, C. Wilson and J. H. Farnaby, *Aust. J. Chem.*, 2022, **75**, 660-675.
6. G. Sheldrick, *Acta Crystallographica Section C*, 2015, **71**, 3-8.
7. O. V. Dolomanov, L. J. Bourhis, R. J. Gildea, J. A. K. Howard and H. Puschmann, *J. Appl. Crystallogr.*, 2009, **42**, 339-341.
